# Supplementary material for: Synthesis and characterization of nanofibrous hollow microspheres with tunable size and morphology via thermally induced phase separation technique
Source: Royal Society of Chemistry journal article supplement (doi:10.1039/c5ra11525f), 2015-01-01
Supplement: c5ra11525f1.pdf [file c5ra11525f1.pdf]

## Supplementary materials for:

### **Synthesis and characterization of nanofibrous hollow microspheres with tunable size and morphology via thermally induced phase separation technique**

Wei Feng,<sup>a</sup> Zhiqi Yin,<sup>a</sup> Weizhong Wang,<sup>a</sup> Liang Chen,<sup>a</sup> Xiaojun Zhou,<sup>b</sup> Kexin Qiu,<sup>b</sup> Jianfeng Zhou,<sup>c</sup> Yanzhong Zhang<sup>a</sup> and Chuanglong He<sup>a\*</sup>

<sup>a</sup> College of Chemistry, Chemical Engineering and Biotechnology, Donghua University, Shanghai 201620, China

<sup>b</sup> College of Materials Science and Engineering, Donghua University, Shanghai 201620, China

<sup>c</sup> Research Center for Analysis and Measurement, Donghua University, Shanghai 201620, China

\* Corresponding author. Address correspondence to: [hcl@dhu.edu.cn](mailto:hcl@dhu.edu.cn); Tel. /fax: +86 21 6779 2742

**Microsphere size distribution.**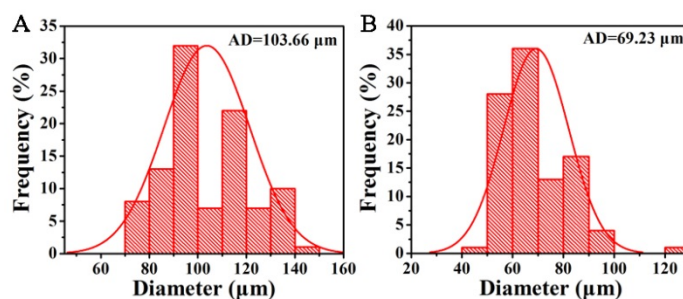

**Fig. S1** The particle size distribution of NHMs synthesized at different propanetriol volume: (A) PT-3; 20 mL, and (B) PT-4; 30 mL.

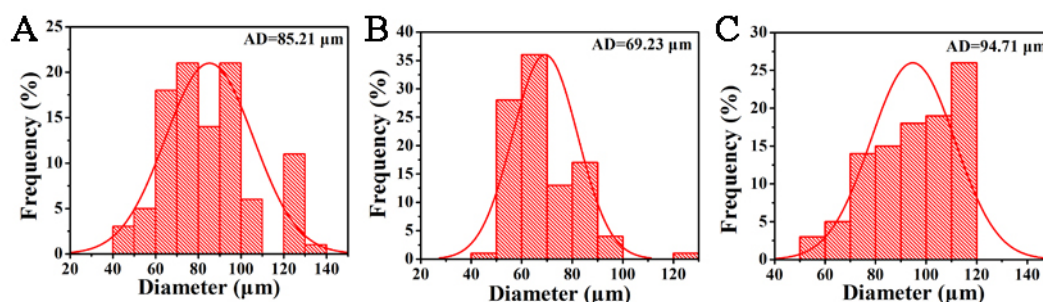

**Fig. S2** The particle size distribution of NHMs synthesized at different PLLA concentration: (A) P-1; 1%, (B) P-2; 2%, and (C) P-3; 4%.

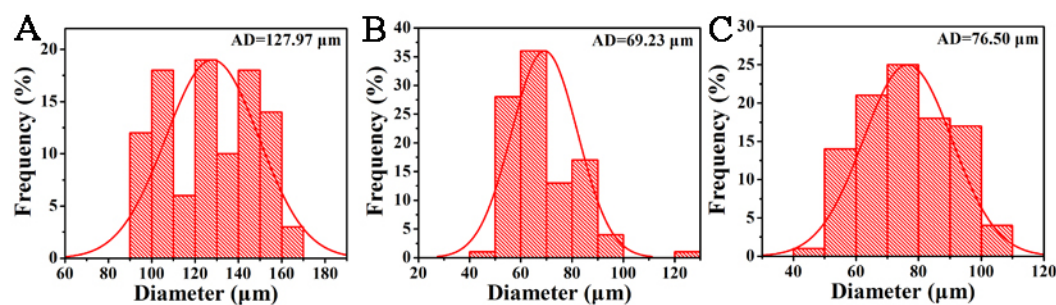

**Fig. S3** The particle size distribution of NHMs synthesized at different propanetriol dropping rate: (A) DR-1; 40 mL/h, (B) DR-2; 90 mL/h, and (C) DR-3; 140 mL/h.

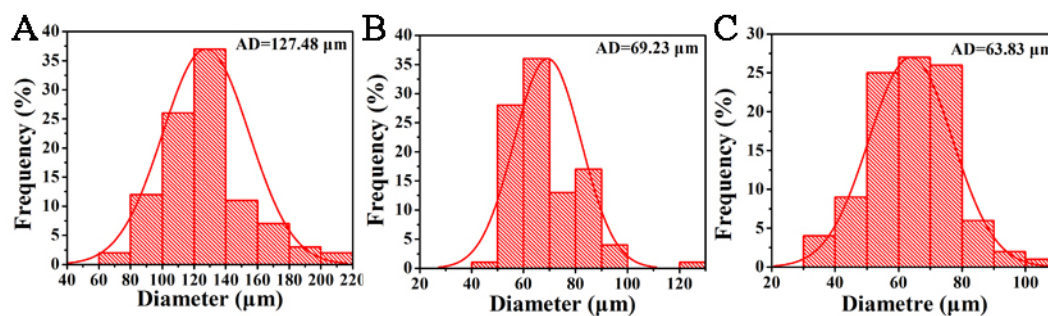

**Fig. S4** The particle size distribution of NHMs synthesized at different stirring speed: (A) SR-1; 400 rpm, (B) SR-2; 800 rpm, and (C) SR-3; 1200 rpm.

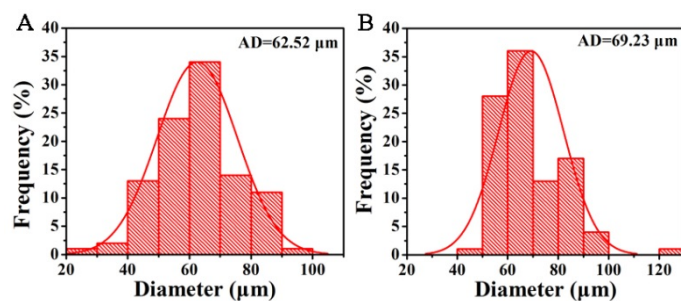

**Fig. S5** The particle size distribution of NHMs synthesized at different addition sequences: (A) S-1; PLLA-PT, and (B) S-2; PT-PLLA.
